# Supplementary material for: Recycling endosomes in human cytotoxic T lymphocytes constitute an auxiliary intracellular trafficking pathway for newly synthesized perforin
Source: Springer Nature journal article supplement (doi:10.1007/s12026-017-8945-8), 2017-08-18
Supplement: MOESM3 [file 14225034]

| **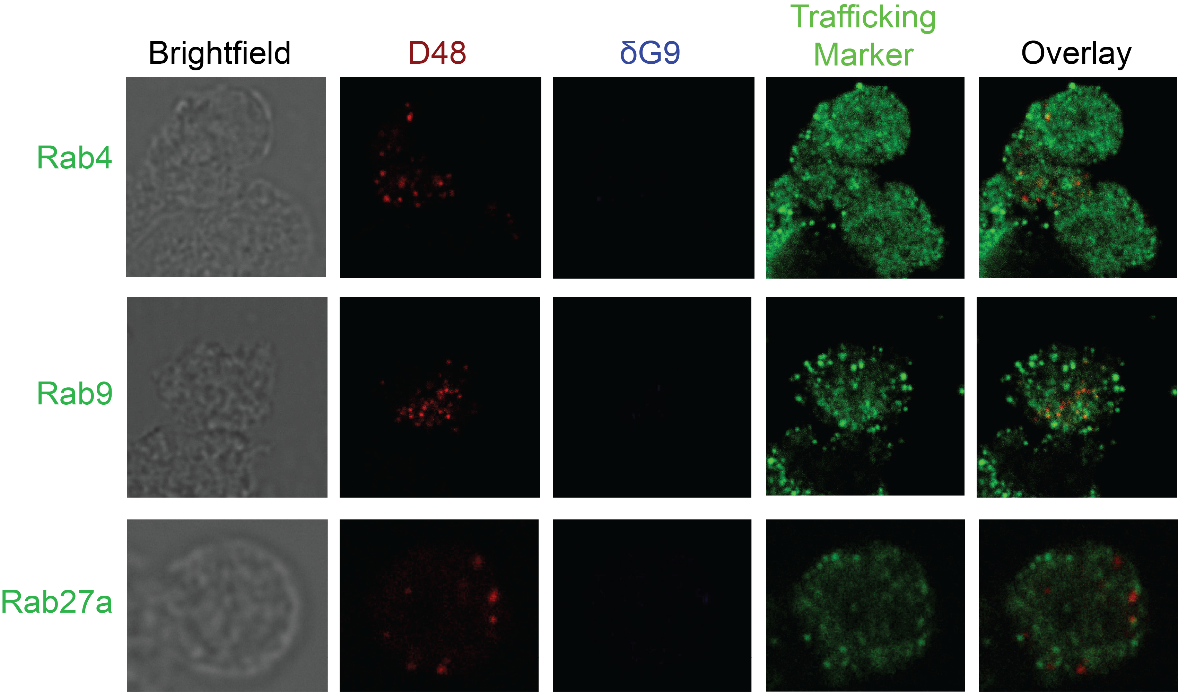**  Figure S3. Sample images of perforin co-localization with rab4, rab9, and rab27a. Antigen-specific CTL from normal human donors were expanded ex vivo for 10-14 days, re-stimulated with their cognate antigen for 6 hours, and then stained with the indicated antibodies and imaged on a confocal microscope with a 100X oil objective. Shown are representative images of perforin localization with the indicated rabs. Supplement to Figure 2. |
| --- |
