# Supplementary material for: Recycling endosomes in human cytotoxic T lymphocytes constitute an auxiliary intracellular trafficking pathway for newly synthesized perforin
Source: Springer Nature journal article supplement (doi:10.1007/s12026-017-8945-8), 2017-08-18
Supplement: MOESM4 [file 14225034]

| 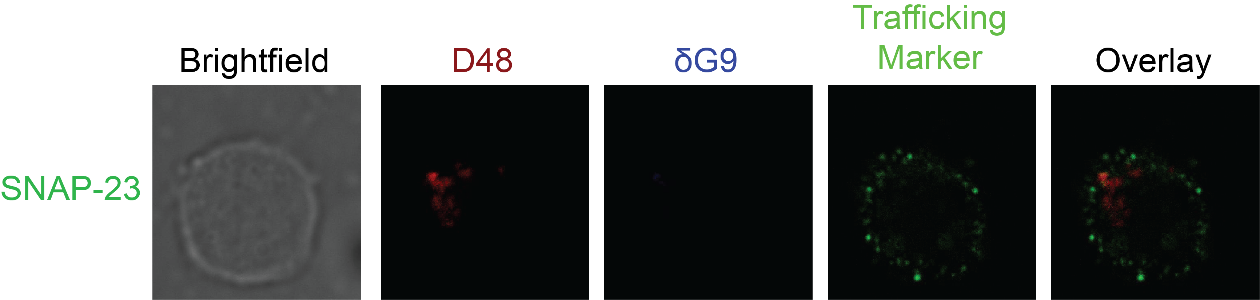  Figure S4. Sample images of perforin co-localization with SNAP-23. Antigen-specific CTL from normal human donors were expanded ex vivo for 10-14 days, re-stimulated with their cognate antigen for 6 hours, and then stained with the indicated antibodies and imaged on a confocal microscope with a 100X oil objective. Shown is a representative image of perforin localization with SNAP-23. Supplement to Figure 3. |
| --- |
